# Supplementary material
Source: Springer Nature journal article supplement (https://www.springermedizin.de/resource/supplementary/12877_2009_320_MOESM3_ESM.pdf/9439382)

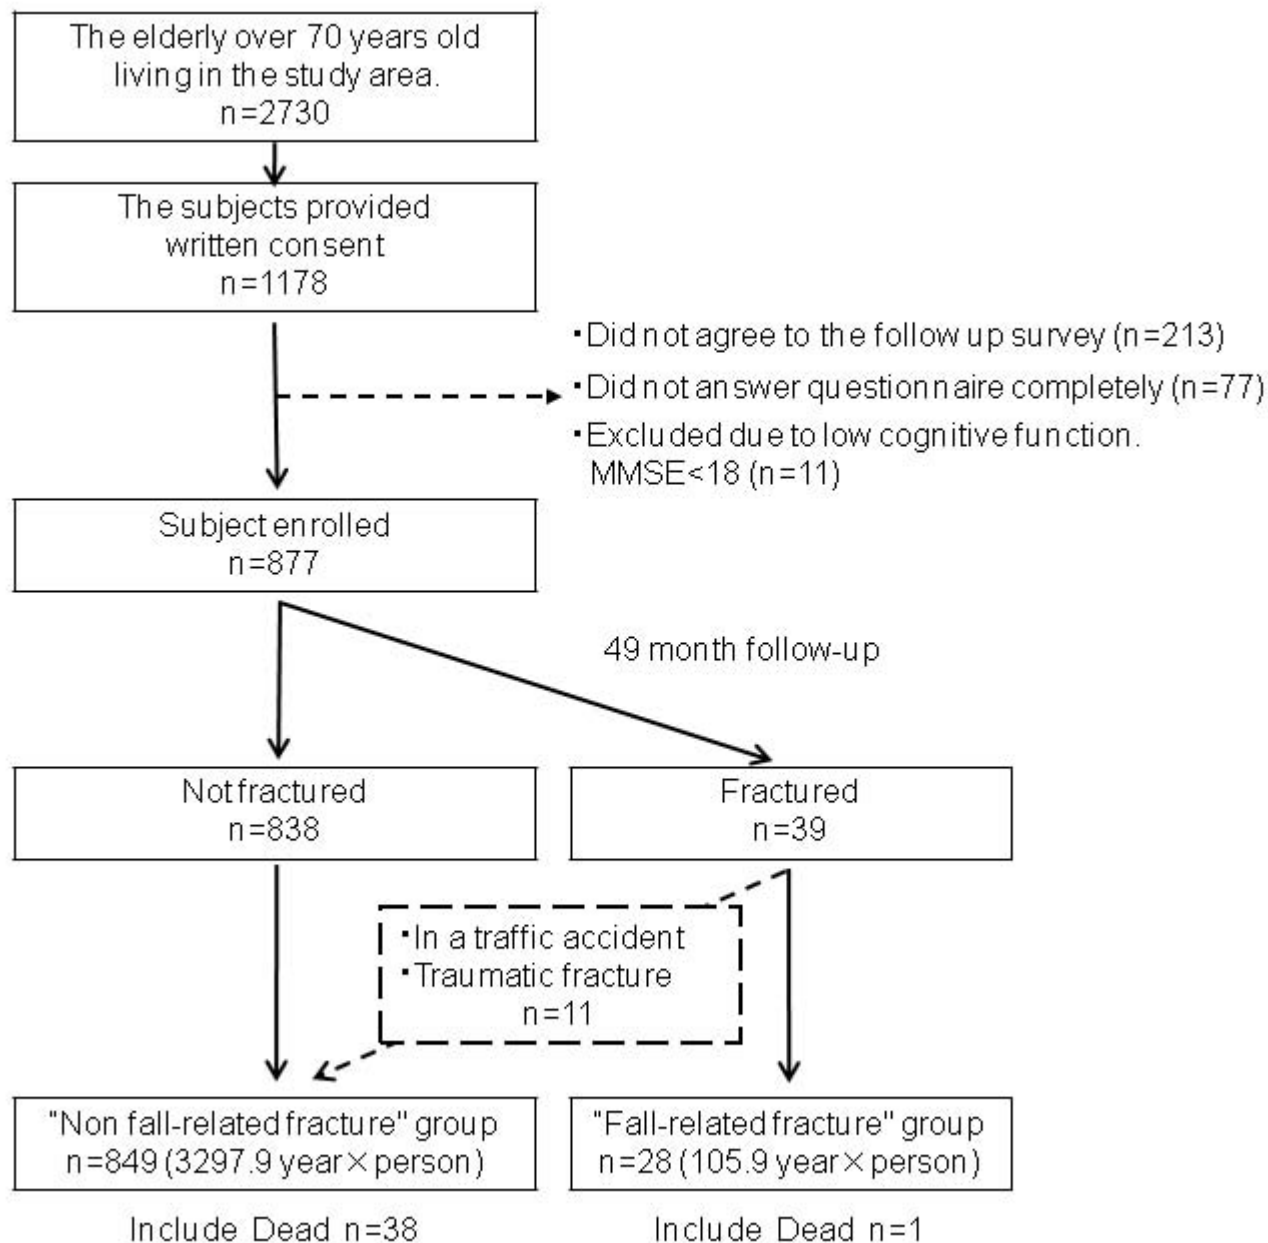

Supplement: MOESM3 [file 9439382]
